# Supplementary material for: Impact of body mass index on in-hospital mortality for six acute cardiovascular diseases in Japan
Source: PubMed Central journal article supplement (PMC9640599; doi:10.1038/s41598-022-23354-y), 2022-11-07
Supplement: 41598_2022_23354_MOESM1_ESM.pdf [file 41598_2022_23354_MOESM1_ESM.pdf]

## **Impact of Body Mass Index on In-hospital Mortality for Six Acute Cardiovascular Diseases in Japan**

**Running Title:** Body mass index and cardiovascular diseases

Naofumi Yoshida, MD, PhD<sup>a†</sup>; Masato Ogawa, PT, PhD<sup>b,c†</sup>; Michikazu Nakai, PhD<sup>d</sup>; Koshiro Kanaoka, MD, PhD<sup>d</sup>; Yoko Sumita<sup>d</sup>; Takuo Emoto, MD, PhD<sup>a</sup>; Yoshihiro Saito, MD<sup>a</sup>; Hiroyuki Yamamoto, MD, PhD<sup>a</sup>; Kazuhiro P. Izawa, PT, PhD<sup>c</sup>; Yoshitada Sakai, MD, PhD<sup>b</sup>; Yushi Hirota, MD, PhD<sup>c</sup>; Wataru Ogawa, MD, PhD<sup>e</sup>; Yoshitaka Iwanaga, MD, PhD<sup>d</sup>; Yoshihiro Miyamoto, MD, PhD<sup>d</sup>; Tomoya Yamashita, MD, PhD<sup>a</sup>; Ken-ichi Hirata, MD, PhD<sup>a</sup>

### **Affiliation:**

<sup>a</sup>Division of Cardiovascular Medicine, Department of Internal Medicine, Kobe University Graduate School of Medicine, Kobe 6500017, Japan

<sup>b</sup>Division of Rehabilitation Medicine, Kobe University Hospital, Kobe 6500017, Japan

<sup>c</sup>Department of Public Health, Graduate School of Health Sciences, Kobe University, Kobe 6540142, Japan

<sup>d</sup>Department of Medical and Health Information Management, National Cerebral and Cardiovascular Center, Osaka 5648565, Japan.

<sup>e</sup>Division of Diabetes and Endocrinology, Department of Internal Medicine, Kobe University Graduate School of Medicine, Kobe 6500017, Japan

<sup>†</sup>These authors contributed equally

### **Corresponding author:**

Tomoya Yamashita, MD, PhD

Division of Cardiovascular Medicine, Department of Internal Medicine,  
Kobe University Graduate School of Medicine

7-5-1 Kusunoki-cho, Chuo-ku, Kobe 6500017, Japan

Phone: +81-78-382-5846

Fax: +81-78-382-5859

E-mail: [tomoya@med.kobe-u.ac.jp](mailto:tomoya@med.kobe-u.ac.jp)

## Supplementary Figure 1. Study population

Flowchart of the study for each cardiovascular disease.

### AHF

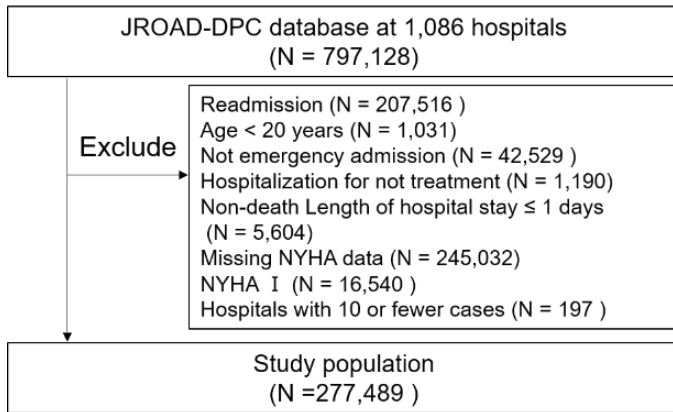

### AMI

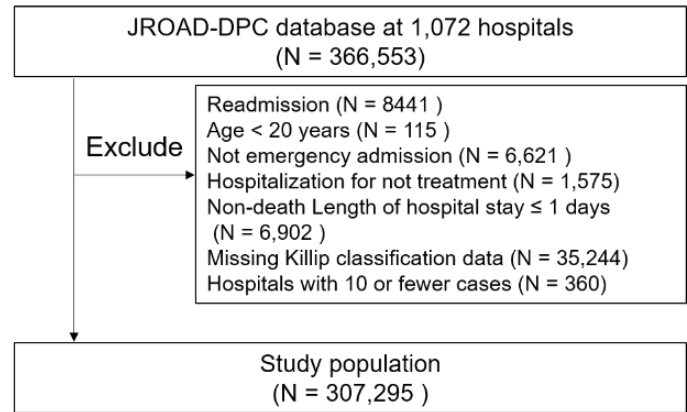

### AAD

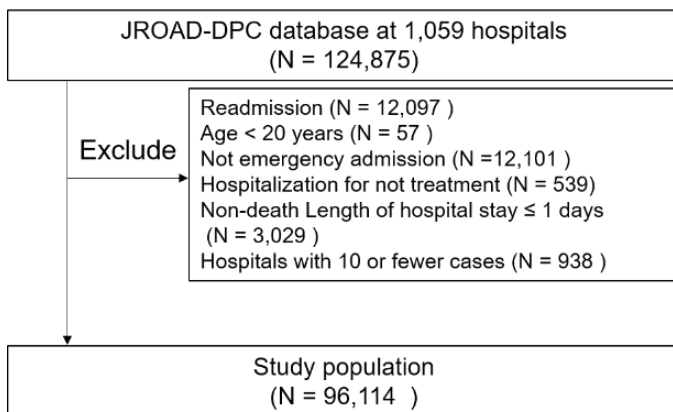

### IS

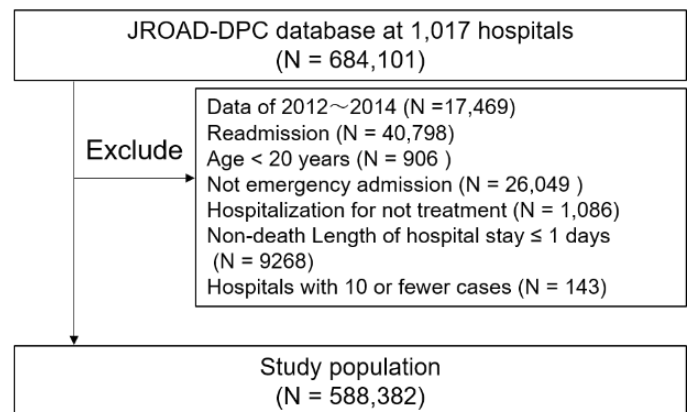

### ICH

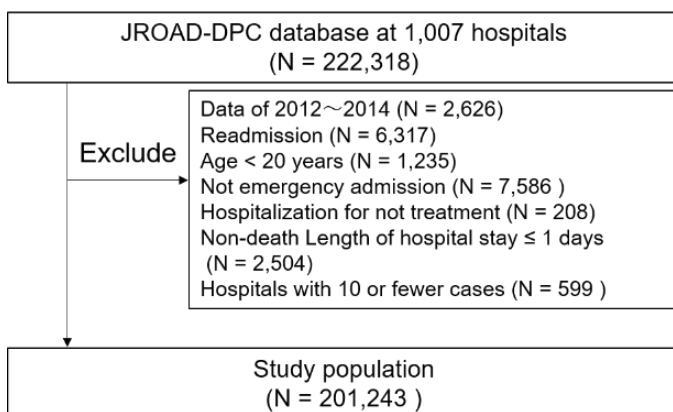

### SAH

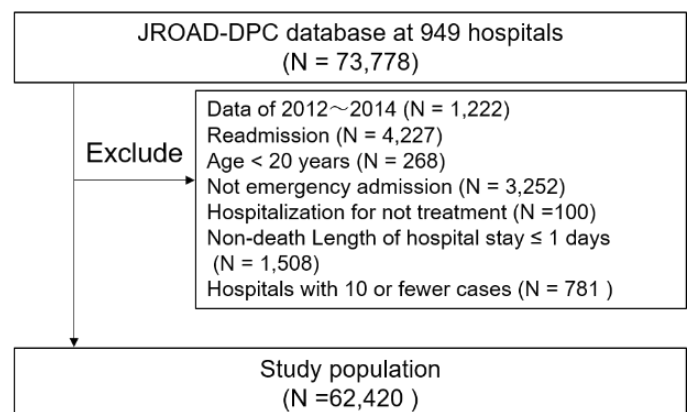

AAD, acute aortic dissection; AHF, acute heart failure; AMI, acute myocardial infarction; BMI, body mass index;

ICH, intracerebral hemorrhage; IS, ischemic stroke; SAH, subarachnoid hemorrhage

## Supplementary Figure 2. Interaction of P values for the indicated age subgroups

P value of interaction by subgroup analyses according to age in each BMI category.

| AHF                |                   |         | AMI                |                  |         | AAD                |                  |         |
|--------------------|-------------------|---------|--------------------|------------------|---------|--------------------|------------------|---------|
|                    | OR (95%CI)        | P value |                    | OR (95%CI)       | P value |                    | OR (95%CI)       | P value |
| Underweight        |                   |         | Underweight        |                  |         | Underweight        |                  |         |
| 20 – 65 y.o.       | 1.91 (1.53-2.38)  | <0.001  | 20 – 65 y.o.       | 1.14 (0.92-1.41) | 0.22    | 20 – 65 y.o.       | 0.99 (0.80-1.23) | 0.92    |
| 65 – 75 y.o.       | 2.83 (2.38-3.37)  | <0.001  | 65 – 75 y.o.       | 2.24 (1.93-2.59) | <0.001  | 65 – 75 y.o.       | 1.89 (1.62-2.21) | <0.001  |
| 75 – y.o.          | 5.20 (4.55-5.93)  | <0.001  | 75 – y.o.          | 4.80 (4.35-5.29) | <0.001  | 75 – y.o.          | 3.62 (3.27-4.02) | <0.001  |
| Normal             |                   |         | Normal             |                  |         | Normal             |                  |         |
| 20 – 65 y.o.       | 1 (Ref)           | -       | 20 – 65 y.o.       | 1 (Ref)          | -       | 20 – 65 y.o.       | 1 (Ref)          | -       |
| 65 – 75 y.o.       | 1.65 (1.43, 1.91) | <0.001  | 65 – 75 y.o.       | 1.59 (1.45-1.74) | <0.001  | 65 – 75 y.o.       | 1.47 (1.32-1.63) | <0.001  |
| 75 – y.o.          | 3.66 (3.20,4.18)  | <0.001  | 75 – y.o.          | 3.63 (3.34-3.94) | <0.001  | 75 – y.o.          | 2.82 (2.57-3.11) | <0.001  |
| Overweight at risk |                   |         | Overweight at risk |                  |         | Overweight at risk |                  |         |
| 20 – 65 y.o.       | 0.90 (0.71-1.13)  | 0.36    | 20 – 65 y.o.       | 1.04 (0.93-1.17) | 0.49    | 20 – 65 y.o.       | 1.27 (1.09-1.47) | 0.002   |
| 65 – 75 y.o.       | 1.48 (1.23-1.78)  | <0.001  | 65 – 75 y.o.       | 1.69 (1.52-1.87) | <0.001  | 65 – 75 y.o.       | 1.57 (1.39-1.78) | <0.001  |
| 75 – y.o.          | 3.31 (2.89-3.79)  | <0.001  | 75 – y.o.          | 3.43 (3.14-3.75) | <0.001  | 75 – y.o.          | 2.93 (2.63-3.26) | <0.001  |
| Obese I            |                   |         | Obese I            |                  |         | Obese I            |                  |         |
| 20 – 65 y.o.       | 0.87 (0.71-1.06)  | 0.16    | 20 – 65 y.o.       | 1.27 (1.15-1.40) | <0.001  | 20 – 65 y.o.       | 1.53 (1.37-1.70) | <0.001  |
| 65 – 75 y.o.       | 1.53 (1.30-1.81)  | <0.001  | 65 – 75 y.o.       | 1.84 (1.66-2.04) | <0.001  | 65 – 75 y.o.       | 1.98 (1.76-2.23) | <0.001  |
| 75 – y.o.          | 3.11 (2.72-3.56)  | <0.001  | 75 – y.o.          | 3.65 (3.33-4.01) | <0.001  | 75 – y.o.          | 3.11 (2.76-3.50) | <0.001  |
| Obese II           |                   |         | Obese II           |                  |         | Obese II           |                  |         |
| 20 – 65 y.o.       | 0.80 (0.63-1.01)  | 0.058   | 20 – 65 y.o.       | 1.59 (1.39-1.82) | <0.001  | 20 – 65 y.o.       | 1.86 (1.61-2.15) | <0.001  |
| 65 – 75 y.o.       | 1.45 (1.13-1.86)  | 0.004   | 65 – 75 y.o.       | 2.63 (2.20-3.14) | <0.001  | 65 – 75 y.o.       | 2.04 (1.59-2.62) | <0.001  |
| 75 – y.o.          | 2.96 (2.51-3.50)  | <0.001  | 75 – y.o.          | 3.66 (3.08-4.35) | <0.001  | 75 – y.o.          | 3.83 (3.07-4.78) | <0.001  |

  

| IS                 |                  |         | ICH                |                  |         | SAH                |                  |         |
|--------------------|------------------|---------|--------------------|------------------|---------|--------------------|------------------|---------|
|                    | OR (95%CI)       | P value |                    | OR (95%CI)       | P value |                    | OR (95%CI)       | P value |
| Underweight        |                  |         | Underweight        |                  |         | Underweight        |                  |         |
| 20 – 65 y.o.       | 1.83 (1.56-2.16) | <0.001  | 20 – 65 y.o.       | 1.16 (1.06-1.28) | 0.002   | 20 – 65 y.o.       | 1.10 (0.97-1.25) | 0.14    |
| 65 – 75 y.o.       | 3.20 (2.87-3.56) | <0.001  | 65 – 75 y.o.       | 1.54 (1.40-1.68) | <0.001  | 65 – 75 y.o.       | 2.05 (1.81-2.32) | <0.001  |
| 75 – y.o.          | 4.95 (4.55-5.38) | <0.001  | 75 – y.o.          | 2.67 (2.51-2.85) | <0.001  | 75 – y.o.          | 4.96 (4.52-5.45) | <0.001  |
| Normal             |                  |         | Normal             |                  |         | Normal             |                  |         |
| 20 – 65 y.o.       | 1 (Ref)          | -       | 20 – 65 y.o.       | 1 (Ref)          | -       | 20 – 65 y.o.       | 1 (Ref)          | <0.001  |
| 65 – 75 y.o.       | 1.72 (1.57-1.88) | <0.001  | 65 – 75 y.o.       | 1.22 (1.15-1.30) | <0.001  | 65 – 75 y.o.       | 1.63 (1.50-1.77) | <0.001  |
| 75 – y.o.          | 3.38 (3.11-3.67) | <0.001  | 75 – y.o.          | 2.28 (2.16-2.41) | <0.001  | 75 – y.o.          | 4.15 (3.87-4.45) | <0.001  |
| Overweight at risk |                  |         | Overweight at risk |                  |         | Overweight at risk |                  |         |
| 20 – 65 y.o.       | 0.89 (0.77-1.02) | 0.09    | 20 – 65 y.o.       | 1.03 (0.94-1.12) | 0.53    | 20 – 65 y.o.       | 1.14 (1.04-1.25) | <0.001  |
| 65 – 75 y.o.       | 1.43 (1.28-1.59) | <0.001  | 65 – 75 y.o.       | 1.16 (1.08-1.26) | <0.001  | 65 – 75 y.o.       | 1.80 (1.61-2.01) | <0.001  |
| 75 – y.o.          | 2.80 (2.57-3.05) | <0.001  | 75 – y.o.          | 1.99 (1.86-2.13) | <0.001  | 75 – y.o.          | 3.79 (3.45-4.17) | <0.001  |
| Obese I            |                  |         | Obese I            |                  |         | Obese I            |                  |         |
| 20 – 65 y.o.       | 1.01 (0.90-1.14) | <0.001  | 20 – 65 y.o.       | 1.15 (1.06-1.24) | 0.001   | 20 – 65 y.o.       | 1.37 (1.26-1.49) | <0.001  |
| 65 – 75 y.o.       | 1.51 (1.36-1.68) | <0.001  | 65 – 75 y.o.       | 1.22 (1.12-1.32) | <0.001  | 65 – 75 y.o.       | 2.03 (1.82-2.27) | <0.001  |
| 75 – y.o.          | 2.67 (2.45-2.92) | <0.001  | 75 – y.o.          | 2.21 (2.06-2.38) | <0.001  | 75 – y.o.          | 4.44 (4.02-4.91) | <0.001  |
| Obese II           |                  |         | Obese II           |                  |         | Obese II           |                  |         |
| 20 – 65 y.o.       | 1.09 (0.91-1.31) | 0.35    | 20 – 65 y.o.       | 1.23 (1.12-1.36) | <0.001  | 20 – 65 y.o.       | 1.34 (1.17-1.53) | <0.001  |
| 65 – 75 y.o.       | 1.69 (1.42-2.02) | <0.001  | 65 – 75 y.o.       | 1.27 (1.06-1.51) | 0.008   | 65 – 75 y.o.       | 2.26 (1.77-2.90) | <0.001  |
| 75 – y.o.          | 2.82 (2.47-3.22) | <0.001  | 75 – y.o.          | 2.28 (1.96-2.66) | <0.001  | 75 – y.o.          | 4.92 (3.76-6.43) | <0.001  |

AAD, acute aortic dissection; AHF, acute heart failure; AMI, acute myocardial infarction; BMI, body mass index; CI, confidence interval; ICH, intracerebral hemorrhage; IS, ischemic stroke; OR, odds ratio; SAH, subarachnoid hemorrhage
